# Supplementary material for: Differential YAP expression in glioma cells induces cell competition and promotes tumorigenesis
Source: Oxford University Press journal article supplement (doi:10.1242/jcs.225714), 2019-01-01
Supplement: jcs225714supp.pdf [file jcs225714supp.pdf]

**Table S1.** Differential gene expression in CYAP and CVector isolated from spheroids without competition

[Click here to Download Table S1](#)

**Table S2.** Differential gene expression in CVector isolated from spheroids with (Comp.) or without competition (non-comp.)

[Click here to Download Table S2](#)

**Table S3.** Differential gene expression in CVector isolated from spheroids with (Comp.) or without competition (non-comp.)

[Click here to Download Table S3](#)
